# Supplementary material
Source: Springer Nature journal article supplement (https://www.springermedizin.de/resource/supplementary/12958_2005_221_MOESM2_ESM.pdf/9567394)

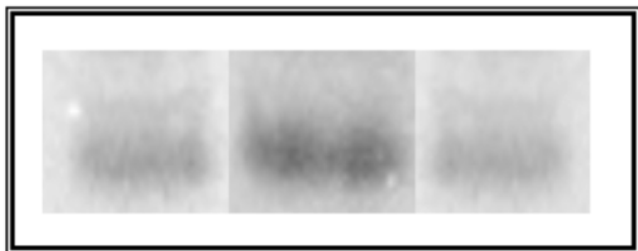

**1**

**2**

**3**

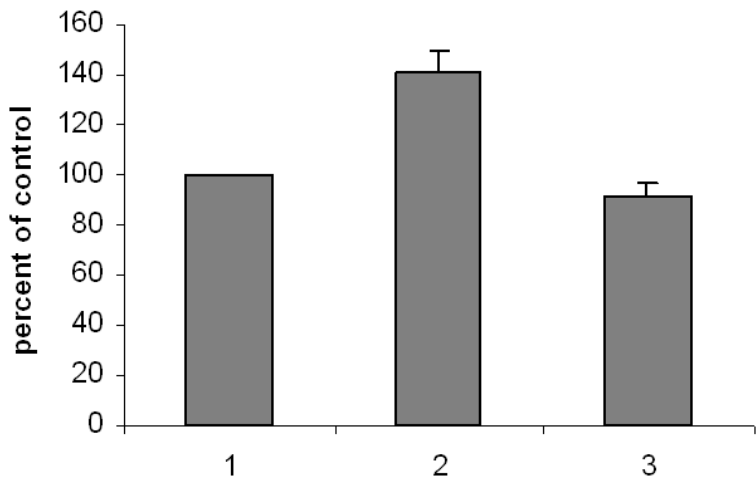

Supplement: MOESM2 [file 9567394]
